# Supplementary material
Source: PubMed Central journal article supplement (PMC6728215)
Supplement: NIHMS1532644-supplement-2.pdf [file NIHMS1532644-supplement-2.pdf]

A

| Day       | Trial 1 | Trial 2 | Trial 3 | Trial 4 |
|-----------|---------|---------|---------|---------|
| 1         | E       | S       | SW      | NE      |
| 2         | SW      | E       | NE      | S       |
| 3         | NE      | SW      | S       | E       |
| 4         | S       | NE      | E       | SW      |
| 5         | E       | SW      | S       | NE      |
| 6         | SW      | NE      | E       | S       |
| 7         | NE      | S       | SW      | E       |
| 8 (Probe) | SE      |         |         |         |

B

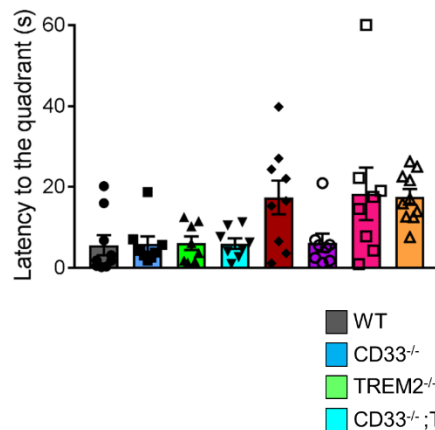

C

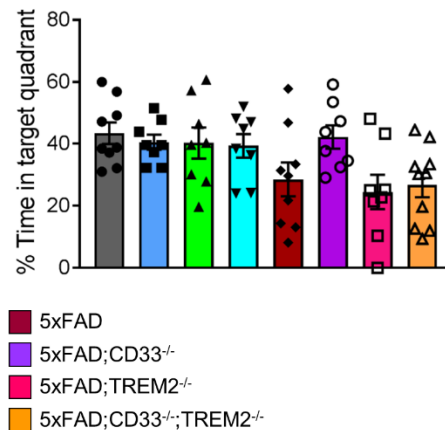

**Figure S1. Morris water maze analysis, Related to Figure 1.** (A) Start positions using distal locations for which the target (platform) was located in the North-West (NW) quadrant. (B and C) 7-month-old WT (n=5M/4F), *CD33*<sup>-/-</sup> (n=4M/4F), *TREM2*<sup>-/-</sup> (n=4M/4F), *CD33*<sup>-/-</sup>;*TREM2*<sup>-/-</sup> (n=4M/4F), *5xFAD* (n=5M/4F), *5xFAD*;*CD33*<sup>-/-</sup> (n=4M/4F), *5xFAD*;*TREM2*<sup>-/-</sup> (n=4M/4F) and *5xFAD*;*CD33*<sup>-/-</sup>;*TREM2*<sup>-/-</sup> (n=5M/5F) mice were evaluated in the Morris water maze test.

Latency to reach the target quadrant where the platform is supposed to be (B) and time spent by the mice in the target quadrant (C) were recorded during the probe test (day 8). No significant differences were found among the mouse groups in the latency to the target quadrant (Kruskal-Wallis ANOVA, Dunn's test) or time spent in the target quadrant (one-way ANOVA, Tukey's test). Data are represented as mean ± SEM.

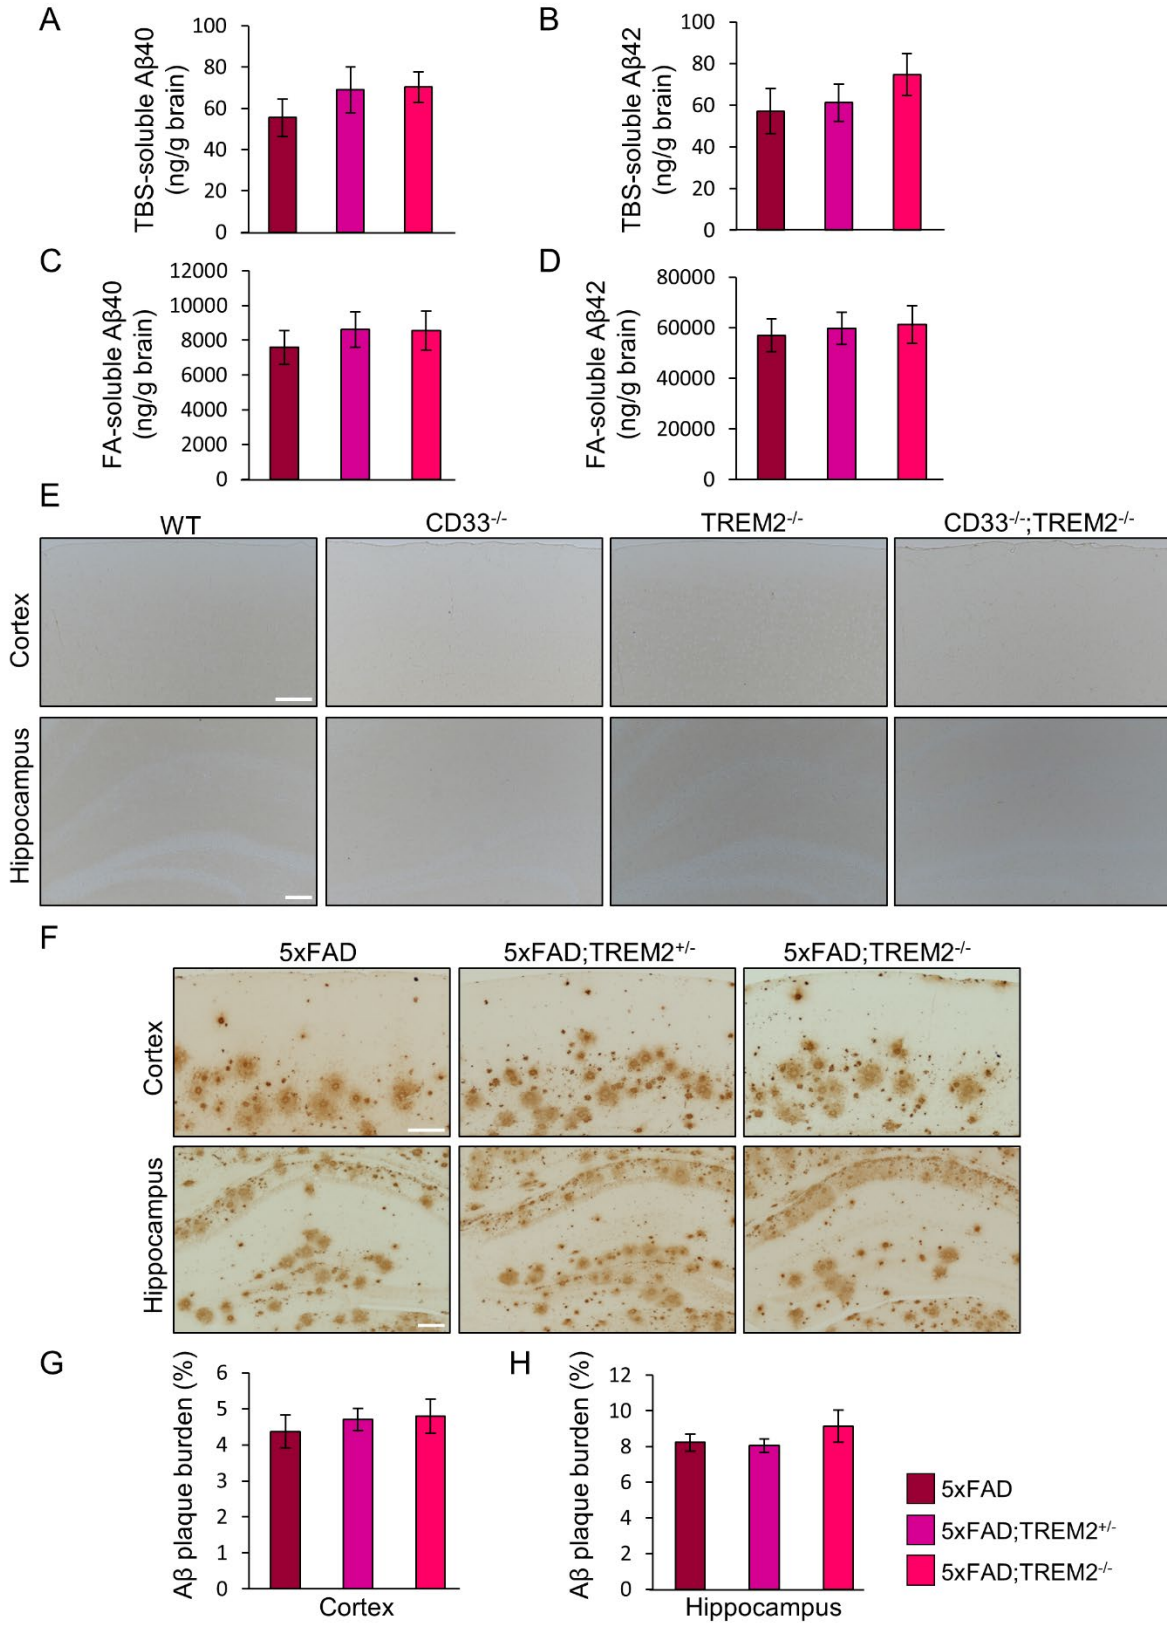

**Figure S2. *TREM2* knock-out does not impact A $\beta$  pathology in *5xFAD* mice at 6 months of age, Related to Figure 2.** (A–D) ELISA analysis of A $\beta$ 40 (A and C) and A $\beta$ 42 (B and D) in TBS-soluble (A and B) and formic acid (FA)-soluble (C and D) fractions isolated from the cortex of 6-month-old *5xFAD* (n=6M/6F), *5xFAD;TREM2<sup>+/-</sup>* (n=6M/6F) and *5xFAD;TREM2<sup>-/-</sup>* (n=4M/4F) mice. No differences in TBS- and FA-soluble A $\beta$ 40 and A $\beta$ 42 levels were found in *5xFAD;TREM2<sup>+/-</sup>* and *5xFAD;TREM2<sup>-/-</sup>* mice in comparison to *5xFAD* (one-way ANOVA, Tukey's test). (E) Brain sections were labeled with the 3D6 antibody directed against A $\beta$ . Representative images of cortex and hippocampus from of 8-month-old control: WT, *CD33<sup>-/-</sup>*, *TREM2<sup>-/-</sup>* and *CD33<sup>-/-</sup>;TREM2<sup>-/-</sup>* mice. The 3D6 antibody did not label control brains. Scale bar represents 100  $\mu$ m. (F) Photomicrographs of cortical and hippocampal fields from brains stained with the 3D6 antibody to detect compact and diffuse A $\beta$  plaques in 6-month-old *5xFAD*, *5xFAD;TREM2<sup>+/-</sup>* and *5xFAD;TREM2<sup>-/-</sup>* mice. Scale bar represents 100  $\mu$ m. (G and H) Quantification of A $\beta$  plaque burden in the cortex (G) and hippocampus (H) of 6-month-old *5xFAD* (n=6M/6F), *5xFAD;TREM2<sup>+/-</sup>* (n=6M/6F) and *5xFAD;TREM2<sup>-/-</sup>* (n=4M/4F) mice. There was no significant difference in A $\beta$  plaque load in *5xFAD;TREM2<sup>+/-</sup>* and *5xFAD;TREM2<sup>-/-</sup>* mice compared to *5xFAD* (one-way ANOVA, Tukey's test). Data are represented as mean  $\pm$  SEM.

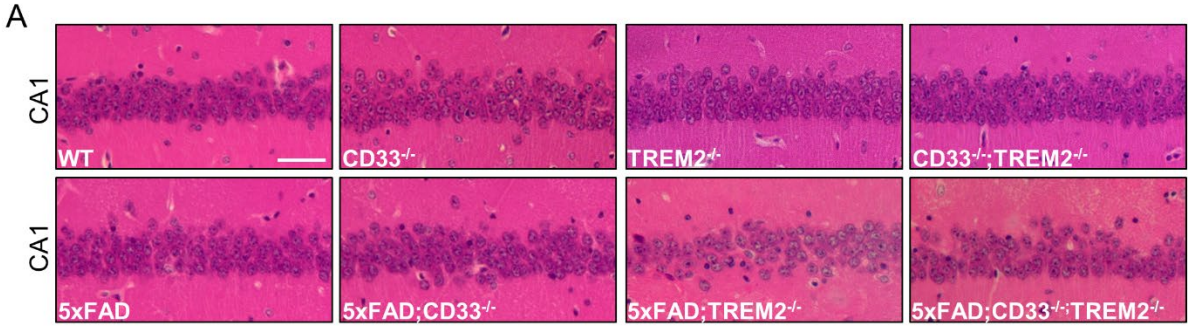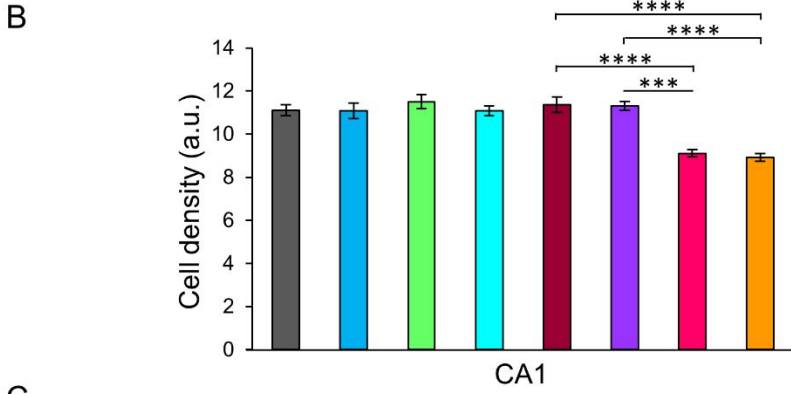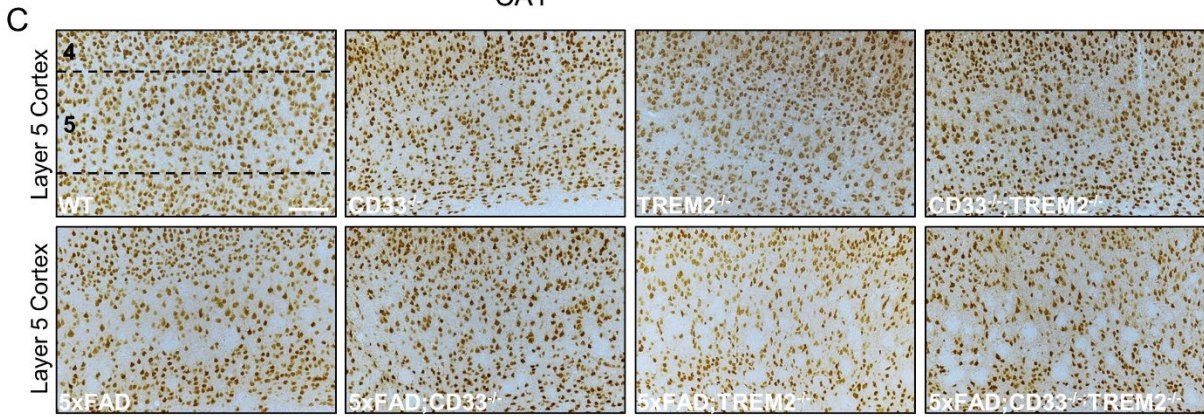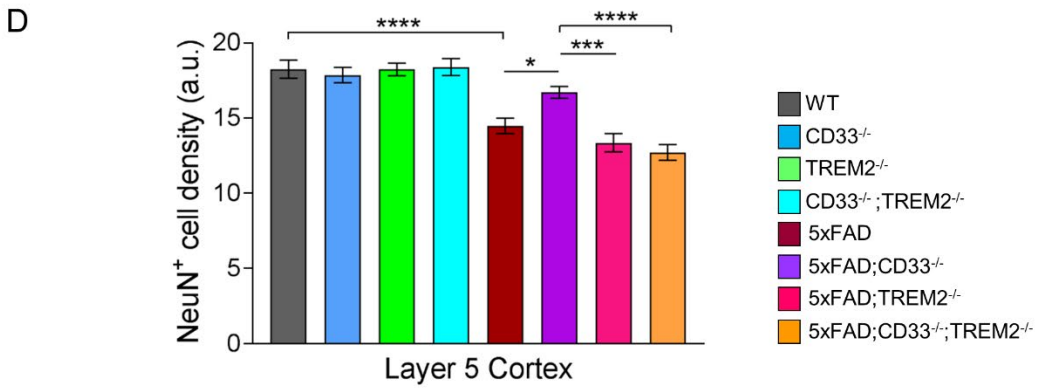

**Figure S3. *TREM2* knock-out leads to reduced neuronal cell density in *5xFAD* mice, which is not rescued by additional knock-out of *CD33*, Related to Figure 3.** (A) Representative pictures of the CA1 region from brains of 8-month-old mice of indicated genotypes, stained with hematoxylin and eosin. Scale bar represents 50  $\mu\text{m}$ . (B) Quantification of CA1 neuron numbers in 8-month-old WT (n=6M/6F), *CD33*<sup>-/-</sup> (n=4M/4F), *TREM2*<sup>-/-</sup> (n=4M/4F), *CD33*<sup>-/-</sup>;*TREM2*<sup>-/-</sup> (n=4M/4F), *5xFAD* (n=5M/6F), *5xFAD*;*CD33*<sup>-/-</sup> (n=4M/4F), *5xFAD*;*TREM2*<sup>-/-</sup> (n=4M/4F) and *5xFAD*;*CD33*<sup>-/-</sup>;*TREM2*<sup>-/-</sup> (n=5M/6F) mice. *5xFAD*;*TREM2*<sup>-/-</sup> and *5xFAD*;*CD33*<sup>-/-</sup>;*TREM2*<sup>-/-</sup> mice showed reduced CA1 neuronal cell density in comparison to *5xFAD* and *5xFAD*;*CD33*<sup>-/-</sup> mice (\*\*p<0.001, \*\*\*\*p<0.0001, one-way ANOVA, Tukey's test). (C) Representative images from the cortex of 8-month-old mice of indicated genotypes, labeled with a NeuN-specific antibody. Scale bar represents 100  $\mu\text{m}$ . (D) Quantification of NeuN<sup>+</sup> cells in the cortical layer 5 of 8-month-old WT (n=4M/4F), *CD33*<sup>-/-</sup> (n=4M/4F), *TREM2*<sup>-/-</sup> (n=4M/4F), *CD33*<sup>-/-</sup>;*TREM2*<sup>-/-</sup> (n=4M/4F), *5xFAD* (n=7M/7F), *5xFAD*;*CD33*<sup>-/-</sup> (n=7M/7F), *5xFAD*;*TREM2*<sup>-/-</sup> (n=4M/4F) and *5xFAD*;*CD33*<sup>-/-</sup>;*TREM2*<sup>-/-</sup> (n=5M/6F) mice. Numbers of cortical layer 5 NeuN<sup>+</sup> cells were significantly increased in *5xFAD*;*CD33*<sup>-/-</sup> mice compared to *5xFAD*, *5xFAD*;*TREM2*<sup>-/-</sup> and *5xFAD*;*CD33*<sup>-/-</sup>;*TREM2*<sup>-/-</sup> mice (\*p<0.05, \*\*p<0.001, \*\*\*\*p<0.0001, one-way ANOVA, Tukey's test). Data are represented as mean  $\pm$  SEM.

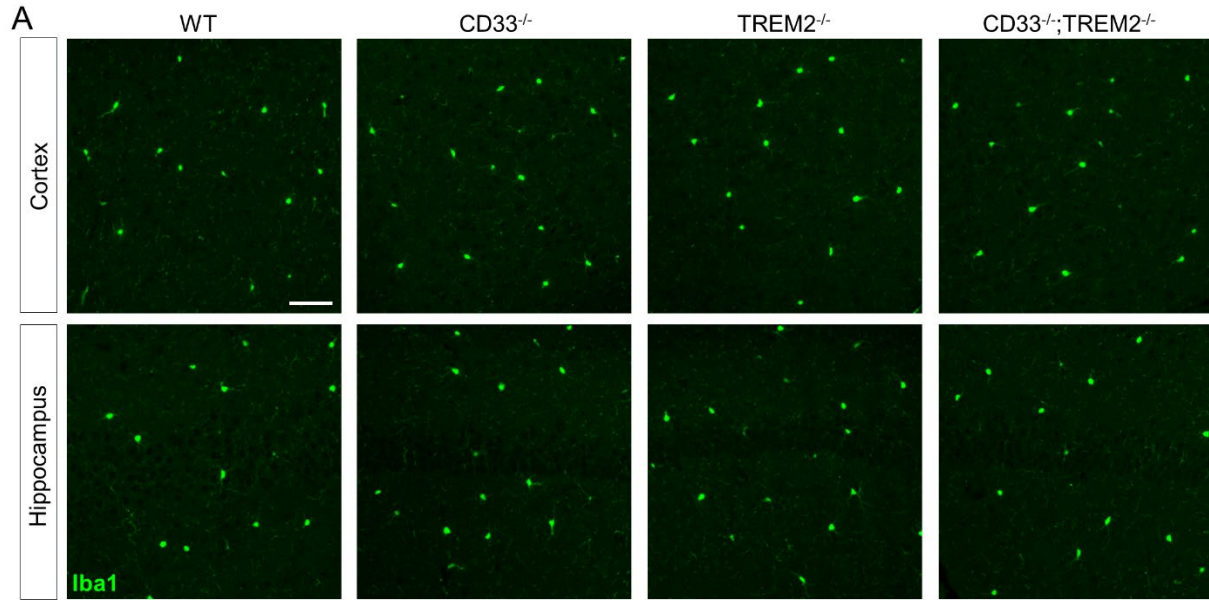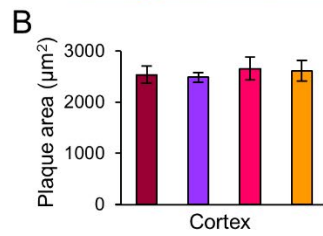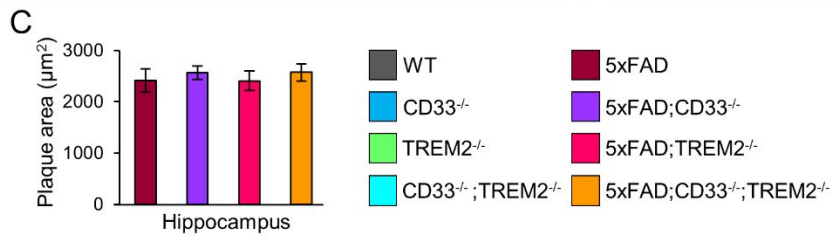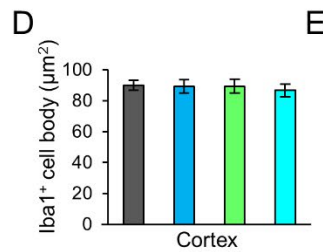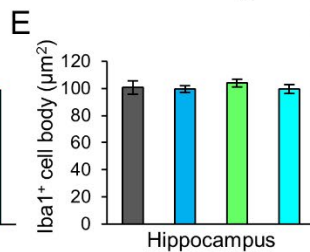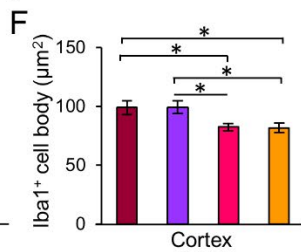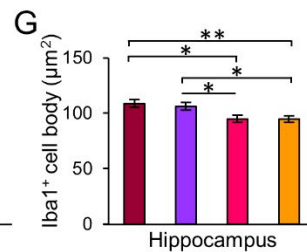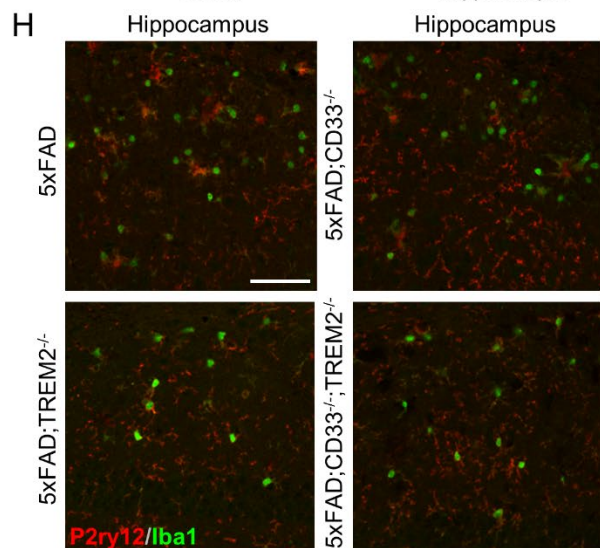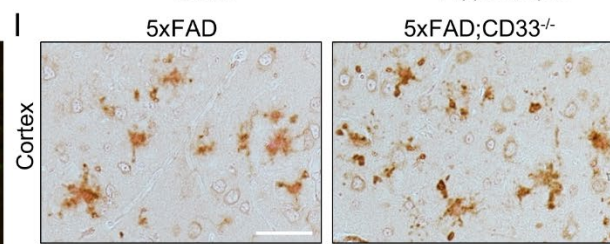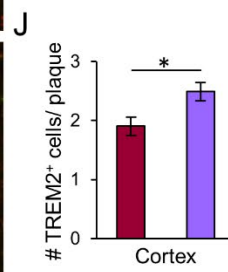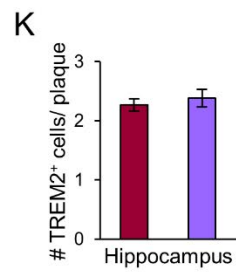

**Figure S4. *CD33* and/or *TREM2* knock-out do not impact *Iba1*<sup>+</sup> cell body area in WT mice, Related to Figure 4.** (A) Representative images from the cortex and hippocampus of 8-month-old WT, *CD33*<sup>-/-</sup>, *TREM2*<sup>-/-</sup> and *CD33*<sup>-/-</sup>;*TREM2*<sup>-/-</sup> mice, labeled with an *Iba1*-specific antibody. Scale bar represents 50 μm. (B and C) Quantification of 3D6<sup>+</sup> area of Aβ plaques in the cortex (B) and hippocampus (C) of *5xFAD* (n=7M/7F), *5xFAD*;*CD33*<sup>-/-</sup> (n=7M/7F), *5xFAD*;*TREM2*<sup>-/-</sup> (n=4M/4F) and *5xFAD*;*CD33*<sup>-/-</sup>;*TREM2*<sup>-/-</sup> (n=5M/6F) mice at 8 months of age. Amyloid plaques that were selected for the analysis of clustering of *Iba1*<sup>+</sup> cells around plaques were of similar size across mouse genotypes (one-way ANOVA, Tukey's test). (D and E) Quantification of *Iba1*<sup>+</sup> cell body area in the cortex (D) and hippocampus (E) of 8-month-old WT (n=4M/4F), *CD33*<sup>-/-</sup> (n=4M/4F), *TREM2*<sup>-/-</sup> (n=4M/4F) and *CD33*<sup>-/-</sup>;*TREM2*<sup>-/-</sup> (n=4M/4F) mice is summarized. All controls exhibited comparable *Iba1*<sup>+</sup> cell body area in cortex and hippocampus (one-way ANOVA, Tukey's test). (F and G) Plaque-associated *Iba1*<sup>+</sup> cells were analyzed for cell body area in the cortex (F) and hippocampus (G) of 8-month-old *5xFAD* (n=7M/7F), *5xFAD*;*CD33*<sup>-/-</sup> (n=7M/7F), *5xFAD*;*TREM2*<sup>-/-</sup> (n=4M/4F) and *5xFAD*;*CD33*<sup>-/-</sup>;*TREM2*<sup>-/-</sup> (n=5M/6F) mice. *5xFAD*;*TREM2*<sup>-/-</sup> and *5xFAD*;*CD33*<sup>-/-</sup>;*TREM2*<sup>-/-</sup> mice exhibited reduced *Iba1*<sup>+</sup> cell body area compared to *5xFAD* and *5xFAD*;*CD33*<sup>-/-</sup> (\*p<0.05, \*\*p<0.01, one-way ANOVA, Tukey's test). (H) Representative images from the hippocampus of 8-month-old *5xFAD*, *5xFAD*;*CD33*<sup>-/-</sup>, *5xFAD*;*TREM2*<sup>-/-</sup> and *5xFAD*;*CD33*<sup>-/-</sup>;*TREM2*<sup>-/-</sup> mice, stained with P2ry12 (red) and *Iba1*-specific antibody (green). Scale bar represents 50 μm. (I) Representative images of cortical fields from brains of *5xFAD* and *5xFAD*;*CD33*<sup>-/-</sup> mice, stained with an anti-TREM2 antibody and Congo red. Scale bar represents 50 μm. (J and K) The number of TREM2<sup>+</sup> cells around plaques was increased in the cortex (J) but not hippocampus (K) of 8-month-old *5xFAD*;*CD33*<sup>-/-</sup> (n=7M/7F) versus *5xFAD* (n=7M/7F) mice (\*p<0.05, unpaired t-test with Welch's correction). Data are represented as mean ± SEM.

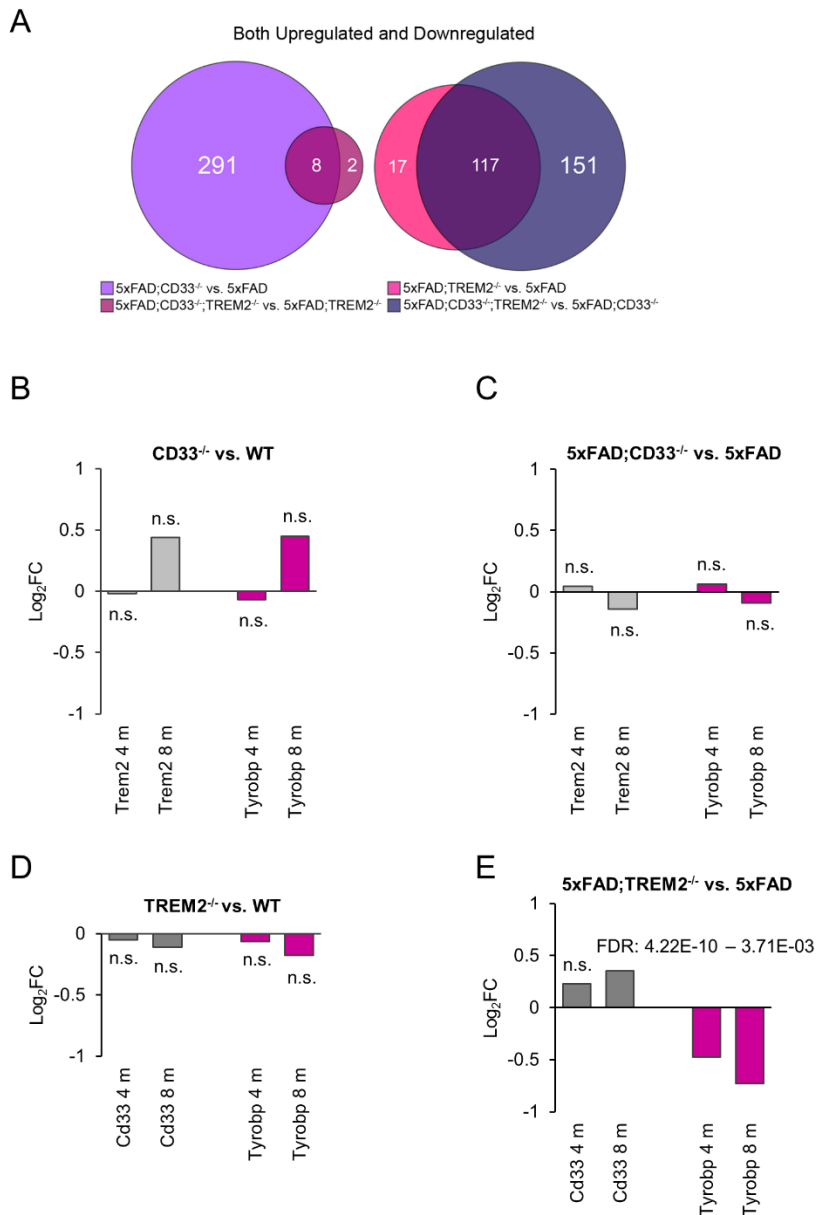

**Figure S5. *CD33* and *TREM2* knock-out do not significantly impact each other's expression levels in *5xFAD* mice, while *TREM2* knock-out has a small effect on *Tyrobp* levels, Related to Figure 6.** (A) Upregulated and downregulated genes (2-fold, FDR<0.05) in 4-month-old *5xFAD;CD33<sup>-/-</sup>* versus *5xFAD* and *5xFAD;CD33<sup>-/-</sup>;TREM2<sup>-/-</sup>* relative to *5xFAD;TREM2<sup>-/-</sup>* (left), as well as in *5xFAD;TREM2<sup>-/-</sup>* compared to *5xFAD* and *5xFAD;CD33<sup>-/-</sup>;TREM2<sup>-/-</sup>* versus *5xFAD;CD33<sup>-/-</sup>* microglia (right), displayed as Venn diagrams. *5xFAD* (n=14M/14F),



*5xFAD;CD33<sup>-/-</sup>* (n=6M/6F), *5xFAD;TREM2<sup>-/-</sup>* (n=11M/11F) and *5xFAD;CD33<sup>-/-</sup>;TREM2<sup>-/-</sup>* (n=5M/5F) mice. (B-E) Expression levels of *Trem2*, *Cd33*, and *Tyrobp* were summarized as log<sub>2</sub>FC of RNA-seq carried out with microglia that were isolated from 4 and 8-month-old mice. FDR values are shown on the figure. (B and C) There was no significant change in *Trem2* or *Tyrobp* expression levels in *CD33<sup>-/-</sup>* versus WT (B) and *5xFAD;CD33<sup>-/-</sup>* versus *5xFAD* (C) datasets at 4 and 8 months. (D) *Cd33* and *Tyrobp* expression levels did not change in *TREM2<sup>-/-</sup>* versus WT microglia. (E) While there was no change in *Cd33* expression levels at 4 months, there was a slight increase (Log<sub>2</sub>FC=0.35) at 8 months in the *5xFAD;TREM2<sup>-/-</sup>* versus *5xFAD* dataset. *Tyrobp* levels were moderately decreased at 4 months (Log<sub>2</sub>FC=-0.47) and 8 months (Log<sub>2</sub>FC=-0.73) in *5xFAD;TREM2<sup>-/-</sup>* versus *5xFAD* microglia. See also Table S3.

**A**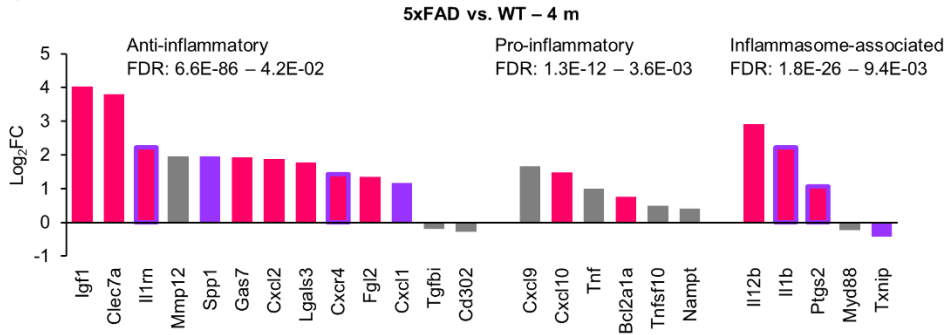**B**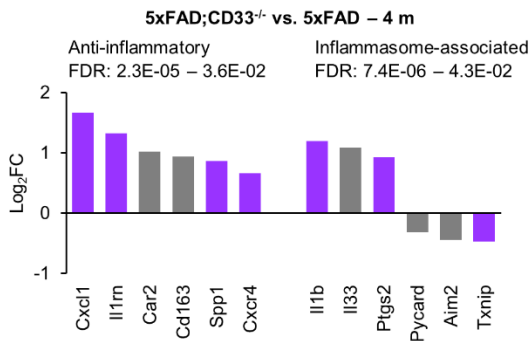**C**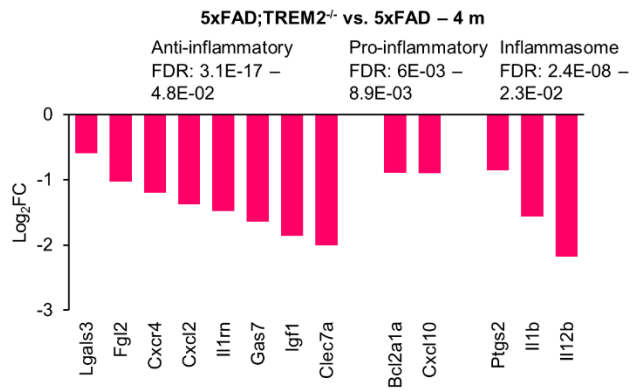**D**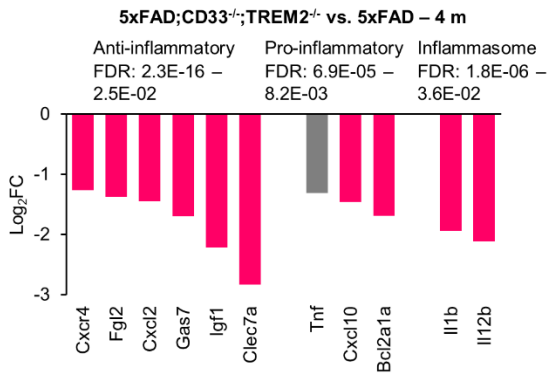**E**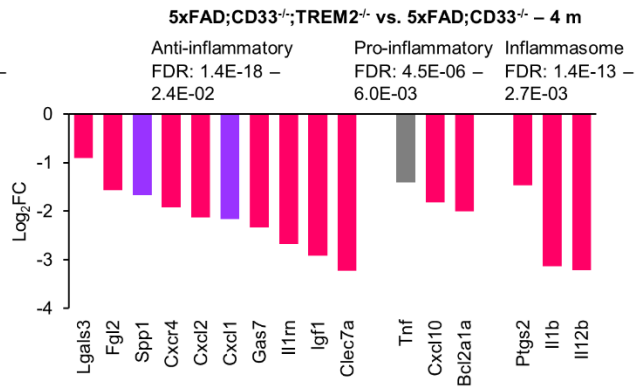

**Figure S6. Downregulation of anti-inflammatory, pro-inflammatory and inflammasome-associated genes in *5xFAD;TREM2*<sup>-/-</sup> microglia is not reversed by additional knock-out of *CD33*, Related to Figure 6.** (A-E) Expression levels of inflammation-related genes were summarized as log<sub>2</sub>FC of RNA-seq carried out with microglia from 4-month-old WT (n=13M/14F), *5xFAD* (n=14M/14F), *5xFAD;CD33*<sup>-/-</sup> (n=6M/6F), *5xFAD;TREM2*<sup>-/-</sup> (n=11M/11F) and *5xFAD;CD33*<sup>-/-</sup>;*TREM2*<sup>-/-</sup> (n=5M/5F) mice. FDR values are shown on the figure. (A) Anti-inflammatory, pro-inflammatory and inflammasome-related genes were concomitantly upregulated in *5xFAD* microglia compared to WT. While pink bars in (A) overlap with (C-E), purple bars and borders overlap with (B) and (E). (B) Anti-inflammatory and inflammasome-associated genes were significantly increased in *5xFAD;CD33*<sup>-/-</sup> microglia versus *5xFAD*. Purple bars in (B) overlap with (A) and (E). (C) *5xFAD;TREM2*<sup>-/-</sup> microglia exhibited reduced expression levels of anti-inflammatory, pro-inflammatory and inflammasome-associated genes relative to *5xFAD*. Pink bars in (C) overlap with (A), (D) and (E). (D) Inflammation-related transcripts were significantly decreased in *5xFAD;CD33*<sup>-/-</sup>;*TREM2*<sup>-/-</sup> microglia compared to *5xFAD*. Pink columns in (D) overlap with (A), (C) and (E). (E) Anti-inflammatory, pro-inflammatory and inflammasome-related genes were downregulated in *5xFAD;CD33*<sup>-/-</sup>;*TREM2*<sup>-/-</sup> microglia versus *5xFAD;CD33*<sup>-/-</sup>. While pink columns in (E) overlap with (A), (C) and (D), purple bars overlap with (A) and (B). See also Table S4.

A

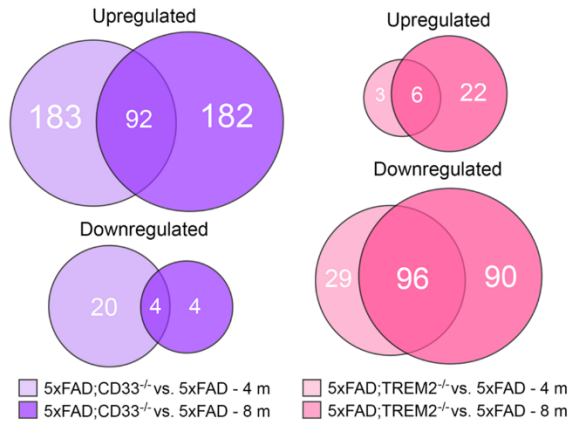

B

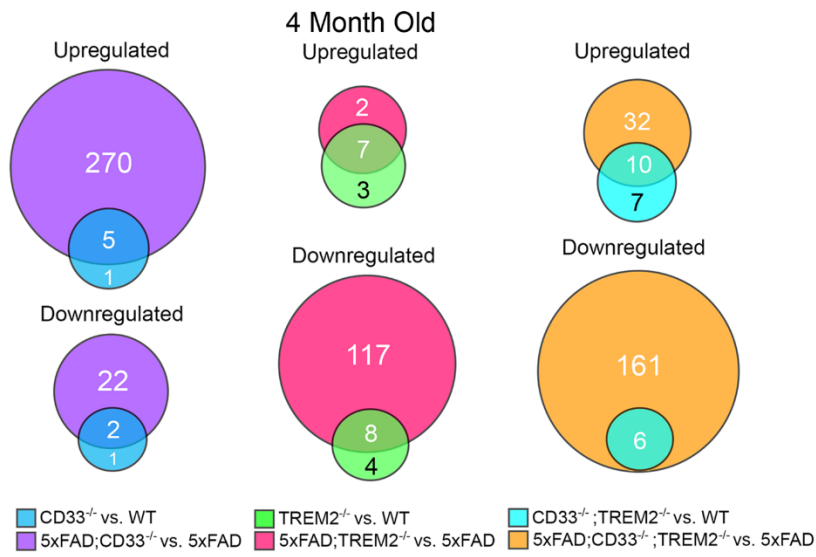

C

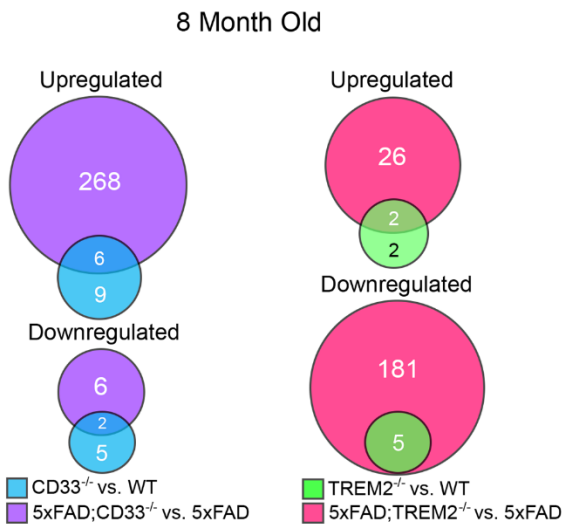

**Figure S7. *CD33* and/or *TREM2* knock-out lead to greater differential gene expression in *5xFAD* mice versus WT, Related to Figure 7.** (A) Upregulated (top) and downregulated (bottom, 2-fold, FDR<0.05) genes in *5xFAD;CD33<sup>-/-</sup>* microglia compared to *5xFAD* (left) and *5xFAD;TREM2<sup>-/-</sup>* relative to *5xFAD* (right) at each time point, displayed as Venn diagrams. *5xFAD*: n=14M/14F, *5xFAD;CD33<sup>-/-</sup>*: n=6M/6F at 4 months; and *5xFAD*: n=12M/12F, *5xFAD;CD33<sup>-/-</sup>*: n=13M/13F mice at 8 months. *5xFAD*: n=14M/14F, *5xFAD;TREM2<sup>-/-</sup>*: n=11M/11F at 4 months; and *5xFAD*: n=10M/9F, *5xFAD;TREM2<sup>-/-</sup>*: n=9M/8F mice at 8 months. (B) Analysis of RNA-seq data revealed 9, 22 and 23 DE genes (2-fold, FDR<0.05) in *CD33<sup>-/-</sup>*, *TREM2<sup>-/-</sup>* and *CD33<sup>-/-</sup>;TREM2<sup>-/-</sup>* microglia compared to WT, respectively, at 4 months. 299, 134 and 209 genes were enriched in *5xFAD;CD33<sup>-/-</sup>*, *5xFAD;TREM2<sup>-/-</sup>* and *5xFAD;CD33<sup>-/-</sup>;TREM2<sup>-/-</sup>* microglia relative to *5xFAD*, respectively. Venn diagrams showed that 5 upregulated (top) and 2 downregulated (bottom) genes overlapped between *CD33<sup>-/-</sup>* microglia versus WT and *5xFAD;CD33<sup>-/-</sup>* versus *5xFAD* (left). 7 upregulated and 8 downregulated genes overlapped between *TREM2<sup>-/-</sup>* microglia versus WT and *5xFAD;TREM2<sup>-/-</sup>* compared to *5xFAD* (center). 10 upregulated and 6 downregulated genes overlapped between *CD33<sup>-/-</sup>;TREM2<sup>-/-</sup>* microglia versus WT and *5xFAD;CD33<sup>-/-</sup>;TREM2<sup>-/-</sup>* versus *5xFAD* (right). (C) At 8 months of age, 22 and 9 genes were enriched in *CD33<sup>-/-</sup>* and *TREM2<sup>-/-</sup>* microglia relative to WT, respectively, and 282 and 214 DE genes in *5xFAD;CD33<sup>-/-</sup>* and *5xFAD;TREM2<sup>-/-</sup>* microglia compared to *5xFAD*, respectively. Venn diagrams showed that 6 upregulated (top) and 2 downregulated (bottom) genes overlapped between *CD33<sup>-/-</sup>* microglia versus WT and *5xFAD;CD33<sup>-/-</sup>* relative to *5xFAD* (left). 2 upregulated and 5 downregulated genes overlapped between *TREM2<sup>-/-</sup>* microglia versus WT and *5xFAD;TREM2<sup>-/-</sup>* versus *5xFAD* (right). See also Table S6.

A

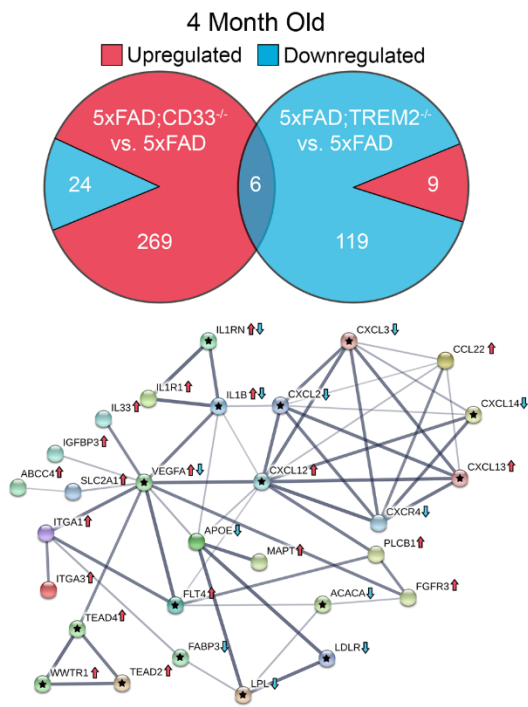

B

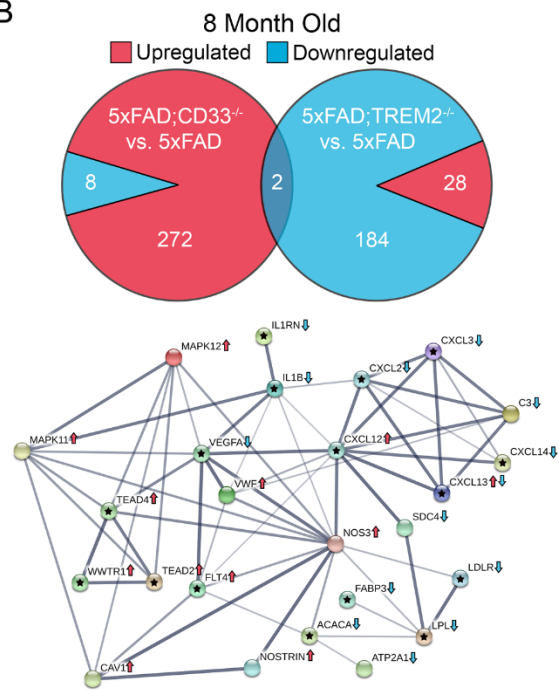

C

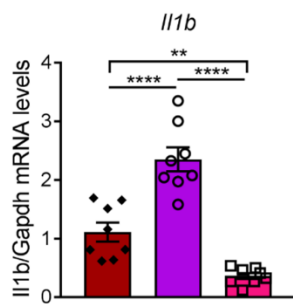

D

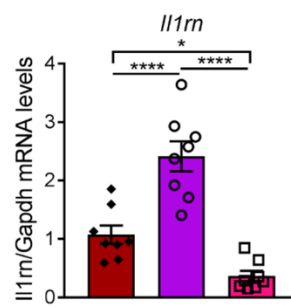

E

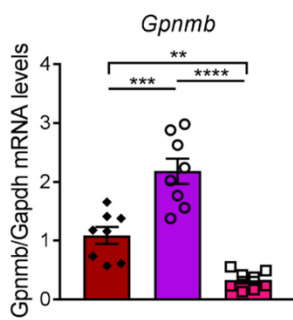

F

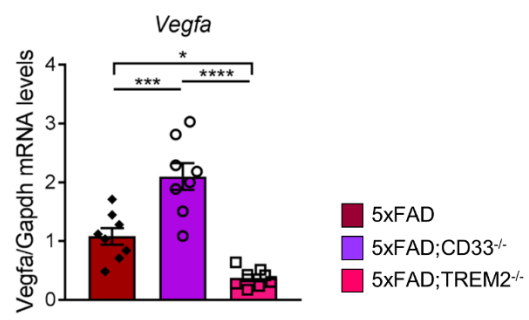

**Figure S8. IL-1 $\beta$  and IL-1RN are central in overlapping inflammation pathways in *5xFAD;CD33<sup>-/-</sup>* and *5xFAD;TREM2<sup>-/-</sup>* microglia, Related to Figure 7.** (A and B) Venn diagram of pie charts showing the overlap of 6 genes (A) and 2 genes (B) that were upregulated in *5xFAD;CD33<sup>-/-</sup>* microglia and downregulated in *5xFAD;TREM2<sup>-/-</sup>* (versus *5xFAD*) at 4 months (A) and 8 months (B). STRING networks showed protein-protein interactions of DE genes associated with inflammation pathways that overlapped between *5xFAD;CD33<sup>-/-</sup>* and *5xFAD;TREM2<sup>-/-</sup>* microglia (compared to *5xFAD*) at 4 months (A) and 8 months (B). Proteins are presented as nodes, which are connected by lines whose thickness represents the confidence level in protein interaction. While red arrows represent proteins upregulated in *5xFAD;CD33<sup>-/-</sup>*, blue arrows mark proteins downregulated in *5xFAD;TREM2<sup>-/-</sup>* microglia. Stars highlight 16 nodes/proteins that are enriched in either genotype and overlap at 4 and 8 months, with IL-1 $\beta$  and IL-1RN at the center of inflammation pathways in *5xFAD;CD33<sup>-/-</sup>* and *5xFAD;TREM2<sup>-/-</sup>* microglia. (C-F) Validation by qPCR of top DE genes obtained with RNAseq. The qPCR analysis was performed by using microglia that were isolated from 4-month-old *5xFAD*, *5xFAD;CD33<sup>-/-</sup>* and *5xFAD;TREM2<sup>-/-</sup>* mice. The qPCR analysis of transcripts including *Il1b* (C), *Il1rn* (D), *Gpnmb* (E) and *Vegfa* (F) showed that mRNA levels of these transcripts were increased in *5xFAD;CD33<sup>-/-</sup>* and decreased in *5xFAD;TREM2<sup>-/-</sup>* microglia versus *5xFAD* (\*p<0.05, \*\*p<0.01, \*\*\*p<0.001, \*\*\*\*p<0.0001, one-way ANOVA, Tukey's test). *Il1b*, *Il1rn*, *Gpnmb* and *Vegfa* mRNA levels were normalized to *Gapdh* mRNA levels. Data are represented as mean  $\pm$  SEM.

| 4 Months                                                                         |          |            | 8 Months |                                                                              |          | 8 Months   |         |                                                              |          |            |         |
|----------------------------------------------------------------------------------|----------|------------|----------|------------------------------------------------------------------------------|----------|------------|---------|--------------------------------------------------------------|----------|------------|---------|
| 5xFAD vs. WT                                                                     | P-Value  | Regulation | Z-Score  | 5xFAD vs. WT                                                                 | P-Value  | Regulation | Z-Score | 5xFAD vs. WT                                                 | P-Value  | Regulation | Z-Score |
| Interferon Signaling                                                             | 8.32E-05 | ↑          | 2.449    | Nitric Oxide Signaling in the Cardiovascular System                          | 1.45E-07 | ↑          | 3.273   | IL-6 Signaling                                               | 1.66E-02 | ↑          | 3.742   |
| Role of Pattern Recognition Receptors in Recognition of Bacteria and Viruses     | 2.00E-03 | ↑          | 2        | Colorectal Cancer Metastasis Signaling                                       | 3.55E-06 | ↑          | 5.048   | Endothelin-1 Signaling                                       | 1.66E-02 | ↑          | 2.065   |
| Mitotic Roles of Polo-Like Kinase                                                | 2.34E-03 | ↑          | 2.236    | Dendritic Cell Maturation                                                    | 2.51E-05 | ↑          | 5.099   | Activation of IRF by Cytosolic Pattern Recognition Receptors | 1.70E-02 | ↑          | 2.333   |
| Colorectal Cancer Metastasis Signaling                                           | 3.24E-02 | ↑          | 3        | RhoGDI Signaling                                                             | 1.10E-04 | ↑          | -4.583  | Cdc42 Signaling                                              | 1.82E-02 | ↑          | 2.714   |
| Pancreatic Adenocarcinoma Signaling                                              | 3.47E-02 | ↑          | 2        | Inhibition of Angiogenesis by TSP1                                           | 1.74E-04 | ↑          | 2.236   | PTEN Signaling                                               | 2.04E-02 | ↑          | -3.207  |
|                                                                                  |          |            |          | Cardiac $\beta$ -adrenergic Signaling                                        | 1.78E-04 | ↑          | 2.84    | NF- $\kappa$ B Signaling                                     | 2.19E-02 | ↑          | 4.359   |
| <b>5xFAD;CD33<sup>-/-</sup> vs. 5xFAD</b>                                        |          |            |          | Signaling by Rho Family GTPases                                              | 2.63E-04 | ↑          | 4.811   | CDK5 Signaling                                               | 2.51E-02 | ↑          | 2.111   |
| IL-6 Signaling                                                                   | 1.95E-04 | ↑          | 2.828    | TREM1 Signaling                                                              | 2.69E-04 | ↑          | 3.207   | Wnt/Ca <sup>2+</sup> pathway                                 | 2.88E-02 | ↑          | 2.828   |
| p38 MAPK Signaling                                                               | 3.47E-03 | ↑          | 2.236    | Dopamine-DARPP32 Feedback in cAMP Signaling                                  | 2.88E-04 | ↑          | 3.71    | Cholecystokinin/Gastrin-mediated Signaling                   | 2.88E-02 | ↑          | 3.464   |
| Sphingosine-1-phosphate Signaling                                                | 4.27E-03 | ↑          | 2.236    | eNOS Signaling                                                               | 3.55E-04 | ↑          | 3.9     | Complement System                                            | 2.95E-02 | ↑          | 2.236   |
| PPAR Signaling                                                                   | 6.17E-03 | ↑          | -2.236   | Interferon Signaling                                                         | 3.55E-04 | ↑          | 2.333   | VEGF Signaling                                               | 3.09E-02 | ↑          | 2.887   |
| NF- $\kappa$ B Signaling                                                         | 7.24E-03 | ↑          | 2.646    | Sperm Motility                                                               | 3.55E-04 | ↑          | 3.5     | Synaptic Long Term Potentiation                              | 3.47E-02 | ↓          | -2      |
| Acute Phase Response Signaling                                                   | 1.95E-02 | ↑          | 2.449    | IL-8 Signaling                                                               | 3.55E-04 | ↑          | 4.796   | Role of NFAT in Cardiac Hypertrophy                          | 3.89E-02 | ↑          | 3.5     |
| HIPPO Signaling                                                                  | 2.24E-02 | ↑          | -2       | ILK Signaling                                                                | 3.55E-04 | ↑          | 3.838   | GNRH Signaling                                               | 4.27E-02 | ↓          | -2      |
| Glioblastoma Multiforme Signaling                                                | 4.90E-02 | ↑          | 2.236    | Cardiac Hypertrophy Signaling                                                | 5.75E-04 | ↑          | 5.099   | Th1 Pathway                                                  | 4.68E-02 | ↑          | 3.464   |
|                                                                                  |          |            |          | Ephrin Receptor Signaling                                                    | 7.41E-04 | ↑          | 3.317   | PCP pathway                                                  | 4.79E-02 | ↑          | 2.449   |
| <b>5xFAD;TREM2<sup>-/-</sup> vs. 5xFAD</b>                                       |          |            |          | Thrombin Signaling                                                           | 1.29E-03 | ↑          | 3.273   |                                                              |          |            |         |
| LXR/RXR Activation                                                               | 3.16E-06 | ↓          | N/A      | Glioblastoma Multiforme Signaling                                            | 1.35E-03 | ↑          | 3.578   |                                                              |          |            |         |
| LPS/IL-1 Mediated Inhibition of RXR                                              | 1.35E-04 | ↓          | N/A      | Pancreatic Adenocarcinoma Signaling                                          | 1.45E-03 | ↑          | 3.606   |                                                              |          |            |         |
| Hepatic Fibrosis                                                                 | 3.72E-04 | ↓          | N/A      | Gas Signaling                                                                | 1.62E-03 | ↑          | 3.606   |                                                              |          |            |         |
| Atherosclerosis Signaling                                                        | 4.79E-04 | ↓          | N/A      | Relaxin Signaling                                                            | 1.82E-03 | ↑          | 3.464   |                                                              |          |            |         |
| Clathrin-mediated Endocytosis Signaling                                          | 5.62E-04 | ↓          | N/A      | Phospholipase C Signaling                                                    | 2.51E-03 | ↑          | 4.123   |                                                              |          |            |         |
|                                                                                  |          |            |          | Acute Phase Response Signaling                                               | 2.88E-03 | ↑          | 3.5     |                                                              |          |            |         |
| <b>5xFAD;CD33<sup>-/-</sup>;TREM2<sup>-/-</sup> vs. 5xFAD</b>                    |          |            |          | Integrin Signaling                                                           | 3.39E-03 | ↑          | 4.6     |                                                              |          |            |         |
| Role of Pattern Recognition Receptors in Recognition of Bacteria and Viruses     | 3.98E-06 | ↓          | -2       | Agrin Interactions at Neuromuscular Junction                                 | 3.89E-03 | ↑          | 3       |                                                              |          |            |         |
| TREM1 Signaling                                                                  | 1.17E-05 | ↓          | -2.449   | CXCR4 Signaling                                                              | 4.37E-03 | ↑          | 3       |                                                              |          |            |         |
| Activation of IRF by Cytosolic Pattern Recognition Receptors                     | 8.13E-04 | ↓          | -2       | HMGB1 Signaling                                                              | 4.79E-03 | ↑          | 3.5     |                                                              |          |            |         |
| Dendritic Cell Maturation                                                        | 1.70E-03 | ↓          | -2.236   | cAMP-mediated signaling                                                      | 4.90E-03 | ↑          | 3.674   |                                                              |          |            |         |
| NF- $\kappa$ B Signaling                                                         | 3.31E-02 | ↓          | -2       | Corticotropin Releasing Hormone Signaling                                    | 5.01E-03 | ↑          | 3.606   |                                                              |          |            |         |
|                                                                                  |          |            |          | Sphingosine-1-phosphate Signaling                                            | 5.50E-03 | ↑          | 2.84    |                                                              |          |            |         |
| <b>5xFAD;CD33<sup>-/-</sup>;TREM2<sup>-/-</sup> vs. 5xFAD;CD33<sup>-/-</sup></b> |          |            |          | Synaptic Long Term Depression                                                | 5.50E-03 | ↑          | 3.771   |                                                              |          |            |         |
| TREM1 Signaling                                                                  | 4.90E-07 | ↓          | -2.828   | Chemokine Signaling                                                          | 5.75E-03 | ↓          | -2      |                                                              |          |            |         |
| Role of Pattern Recognition Receptors in Recognition of Bacteria and Viruses     | 4.27E-05 | ↓          | -2       | Tec Kinase Signaling                                                         | 6.17E-03 | ↑          | 3.873   |                                                              |          |            |         |
| Dendritic Cell Maturation                                                        | 6.76E-05 | ↓          | -2.828   | Production of Nitric Oxide and Reactive Oxygen Species in Macrophages        | 6.46E-03 | ↑          | 3.411   |                                                              |          |            |         |
| Activation of IRF by Cytosolic Pattern Recognition Receptors                     | 2.69E-03 | ↓          | -2       | p38 MAPK Signaling                                                           | 8.13E-03 | ↑          | 3.742   |                                                              |          |            |         |
| IL-6 Signaling                                                                   | 6.76E-03 | ↓          | -2.236   | Calcium Signaling                                                            | 8.91E-03 | ↑          | 2.646   |                                                              |          |            |         |
| HMGB1 Signaling                                                                  | 7.94E-03 | ↓          | -2       | TGF- $\beta$ Signaling                                                       | 9.55E-03 | ↑          | 2.333   |                                                              |          |            |         |
| Production of Nitric Oxide and Reactive Oxygen Species in Macrophages            | 9.55E-03 | ↓          | -2.449   | Actin Cytoskeleton Signaling                                                 | 1.10E-02 | ↑          | 3.207   |                                                              |          |            |         |
| PPAR Signaling                                                                   | 1.12E-02 | ↓          | 2        | Regulation of Actin-based Motility by Rho                                    | 1.15E-02 | ↑          | 2.887   |                                                              |          |            |         |
| Nitric Oxide Signaling in the Cardiovascular System                              | 2.09E-02 | ↓          | -2       | Antioxidant Action of Vitamin C                                              | 1.26E-02 | ↑          | -3.162  |                                                              |          |            |         |
| Acute Phase Response Signaling                                                   | 2.14E-02 | ↓          | -2.236   | IL-1 Signaling                                                               | 1.35E-02 | ↑          | 3       |                                                              |          |            |         |
| NF- $\kappa$ B Signaling                                                         | 2.63E-02 | ↓          | -2.236   | Role of Pattern Recognition Receptors in Recognition of Bacteria and Viruses | 1.41E-02 | ↑          | 2.828   |                                                              |          |            |         |
| Colorectal Cancer Metastasis Signaling                                           | 2.88E-02 | ↓          | -2.449   | Gq Signaling                                                                 | 1.48E-02 | ↑          | 2.84    |                                                              |          |            |         |
| IL-8 Signaling                                                                   | 3.72E-02 | ↓          | -2.236   | PPAR Signaling                                                               | 1.58E-02 | ↑          | -2.887  |                                                              |          |            |         |



**Table S2. Effects of aging and knock-out of *CD33* and/or *TREM2* on biological pathways in *5xFAD* microglia, Related to Figures 5, 6 and 7.** Early (4 months of age) and late (8 months of age) downregulated and upregulated gene data sets (2-fold difference, FDR<0.05) were analyzed by Ingenuity Pathway Analysis (IPA). IPA revealed upregulation and activation of most pathways in 4-month-old *5xFAD* microglia compared to WT and in *5xFAD;CD33<sup>-/-</sup>* versus *5xFAD*. Most pathways were downregulated and inhibited in *5xFAD;TREM2<sup>-/-</sup>* microglia relative to *5xFAD*, *5xFAD;CD33<sup>-/-</sup>;TREM2<sup>-/-</sup>* compared to *5xFAD* and *5xFAD;CD33<sup>-/-</sup>;TREM2<sup>-/-</sup>* versus *5xFAD;CD33<sup>-/-</sup>* at 4 months of age. IPA analysis also showed that most pathways were upregulated and activated in 8-month-old *5xFAD* microglia relative to WT. While *CD33* knock-out led to upregulation and activation of pathways, *TREM2* knock-out resulted in downregulation and inhibition of pathways in *5xFAD* microglia at 8 months of age. Activation Z-scores were generated by IPA; Z-score<-2, pathway inhibited; Z-score>2, pathway activated; p-value<0.05. N/A: not applicable. See also Tables S1, S3 and S5.
